# Supplementary material for: An Okinawan-Based Nordic Diet Leads to Profound Effects on Gut Microbiota and Plasma Metabolites Linked to Glucose and Lipid Metabolism
Source: MDPI journal article supplement (doi:10.3390/nu15143273), 2023-07-24
Supplement: s1 [file s1]

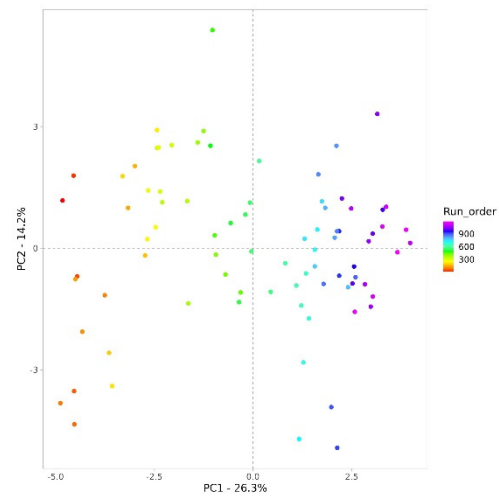

(A)

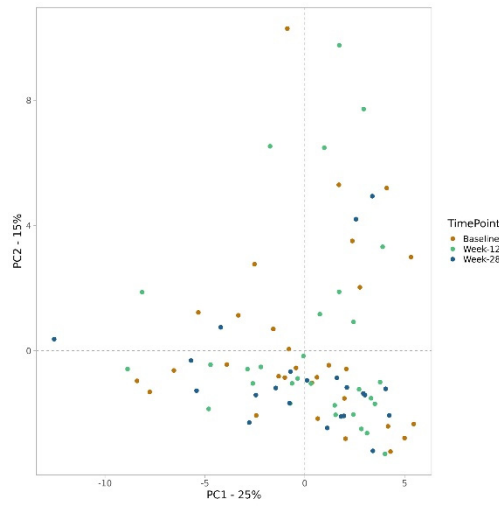

(B)

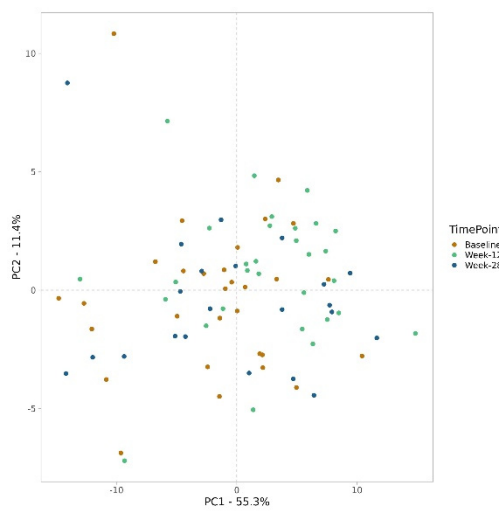

(C)

**Figure S1.** Principal component analysis (PCA) of metabolomics of GC-MS (A), LC-MS (B), and Lipidomics (C).

**Supplementary Table S1.** Description of food items included in the Okinawan-based Nordic diet

| <b>Food groups</b>                       |                                                                                                                                                                                                                                                                                           |
|------------------------------------------|-------------------------------------------------------------------------------------------------------------------------------------------------------------------------------------------------------------------------------------------------------------------------------------------|
| <i>Root vegetables</i>                   | Hot or cold. Red or yellow carrots as snacks or incorporated in the dish. Parsnips, parsley root, rutabaga, celery root, beetroot, artichoke, or sweet potatoes as part of the dishes.                                                                                                    |
| <i>Potatoes</i>                          | Shredded in potatoes burger, fried raw.                                                                                                                                                                                                                                                   |
| <i>Vegetables</i>                        | Onion, leek, garlic, cabbage, cauliflower, broccoli, squash, eggplant, fennel, spinach, various types of salad, tomato, pepper, cucumber, mushroom, and asparagus.                                                                                                                        |
| <i>Legumes</i>                           | Fresh; green peas, sweet peas, and soybean (edamame).<br>Dried; white and black beans, kidney beans, and lentils.                                                                                                                                                                         |
| <i>Nuts</i>                              | Walnuts, almonds, and cashews.                                                                                                                                                                                                                                                            |
| <i>Seeds</i>                             | Sunflower seeds, pumpkin seeds, linseed, and sesame seed, as part of snacks served with fruits and berries.                                                                                                                                                                               |
| <i>Fruits and berries</i>                | Apple, orange, pear, strawberry, blueberry, lingonberry, dried apricots, and prunes. Coco nut milk was used for cooking.                                                                                                                                                                  |
| <i>Meat products and poultry</i>         | Chicken, rooster, turkey, game meat (hart and deer), and ground beef.                                                                                                                                                                                                                     |
| <i>Fish and seafood</i>                  | Salmon, codfish, plaice, mackerel, herring, and prawns.                                                                                                                                                                                                                                   |
| <i>Egg</i>                               | Eggs were used for cooking and as snacks.                                                                                                                                                                                                                                                 |
| <i>Dairy products</i>                    | Low-fat drinking milk (maximum 1.5% fat), filmjöl (a Swedish fermented product similar to yogurt) and low-fat yogurt (1.5% fat), hard cheese (17% fat), parmesan cheese, cottage cheese, and quark. Whipped cream (36% fat) and soy cream used for cooking, and Turkish yogurt (10% fat). |
| <i>Fat and oil</i>                       | Vegetable oil including rapeseed oil, sesame oil, and olive oil for cooking and dressing. Vegetable fat spread (60% fat) for bread.                                                                                                                                                       |
| <i>Rice</i>                              | Whole-grain rice and black Thai rice. A maximum of half a dl of uncooked rice per serving.                                                                                                                                                                                                |
| <i>Cereals</i>                           | Rolled oats, rye flakes, whole-grain whole-kernel rye, oat, barley, and wheat. Bread rich in whole-grain, a maximum of two slices per day. Whole-grain pasta, bean paste, millet, oat bran, quinoa, and rye flour.                                                                        |
| <i>Beverages/liquids (non-alcoholic)</i> | Recommended free amount of tap water or mineral water with the meals. Light products to be avoided. Tea, filtered coffee, or instant coffee.                                                                                                                                              |
| <i>Spices</i>                            | Own preference with restrictions on salt.                                                                                                                                                                                                                                                 |
| <i>Sweets and desserts</i>               | Homemade dark chocolate (>70%), bean truffles, coconut flakes, ginger, and prune cake. No refined sugar or sweetener was used, but instead natural sweet foods like prunes, pears, and occasionally honey.                                                                                |
| <i>Alcoholic beverages</i>               | Maximal intake of alcoholic beverages was set to 30 g ethanol/week.                                                                                                                                                                                                                       |

**Supplementary Table S2.** Nutrition composition and daily mean intake of energy, nutrients, and food components of the Okinawa-based Nordic diet

| Nutritional value            | Unit | Calculated value | E%    | Recommended (NNR 2012) |
|------------------------------|------|------------------|-------|------------------------|
| Total Energy                 | kcal | 1866             |       |                        |
| Energy (excluding beverages) | kcal | 1629             |       |                        |
| Protein                      | g    | 95.0             | 23 E% | 10–20 E%               |
| Fat                          | g    | 63.9             | 35 E% | 25–40 E%               |
| Saturated fatty acids        | g    | 18.7             | 10 E% | <10 E%                 |
| Polyunsaturated fatty acids  | g    | 14.9             | 8 E%  | 5–10 E%                |
| Mono-unsaturated fatty acids | g    | 17.8             | 10 E% | 10–20 E%               |
| Carbohydrates                | g    | 168.4            | 42 E% | 45–60 E%               |
| Sucrose                      | g    | 23.5             | 6 E%  | <10 E%                 |
| Dietary fiber                | g    | 35.9             | 4 E%  | 25–35 g                |
| alpha-Tocopherol             | mg   | 1.9              |       |                        |
| beta-Carotene                | μg   | 9902.1           |       |                        |
| Retinol                      | μg   | 259.7            |       |                        |
| Vitamin A                    | μg   | 139.9            |       | 700                    |
| Vitamin D                    | μg   | 8.8              |       | 10                     |
| Vitamin E                    | mg   | 11.4             |       | 8                      |
| Thiamine                     | mg   | 1.1              |       | 1.1                    |
| Riboflavin                   | mg   | 1.2              |       | 1.2                    |
| Niacin equivalent            | mg   | 34.5             |       | 14                     |
| Niacin                       | mg   | 19.7             |       | 14                     |
| Vitamin B6                   | mg   | 2.1              |       | 1.2                    |
| Folate                       | μg   | 386.1            |       | 300                    |
| Vitamin B12                  | μg   | 10.4             |       | 2                      |
| Vitamin C                    | mg   | 303.0            |       | 75                     |
| Sodium                       | mg   | 2401.1           |       | 2300                   |
| Potassium                    | mg   | 3385.6           |       | 3100                   |
| Phosphorus                   | mg   | 1446.7           |       | 600                    |
| Calcium                      | mg   | 840.4            |       | 800                    |
| Iron                         | mg   | 10.7             |       | 15                     |
| Magnesium                    | mg   | 317.4            |       | 280                    |
| Zinc                         | mg   | 9.7              |       | 7                      |
| Iodine                       | μg   | 34.9             |       | 150                    |
| Selenium                     | μg   | 61.0             |       | 50                     |

(n=30). The results are calculated on the intake of a normal week. The daily average calorie content of the meals are given in kcal and the energy percentage (E%) is given for protein, fat, saturated fatty acids, polyunsaturated fatty acids, mono-unsaturated fatty acids, carbohydrate, and sucrose, respectively. Recommendations for a traditional diet according to the Nordic Nutrition Recommendations are shown for comparison [14]. Recommendations for total daily energy intake are not given since they are individual and differ between subjects. Vitamins A and D, and Iodine may be underestimated due to lack of data.

**Supplementary Table S3.** Description of the breakfast composition in the subjects

| Subjects | Breakfast at baseline   |                                 |                              |                               |                                | Breakfast at week 12    |                                  |                              |                               |                                |
|----------|-------------------------|---------------------------------|------------------------------|-------------------------------|--------------------------------|-------------------------|----------------------------------|------------------------------|-------------------------------|--------------------------------|
|          | <i>Energy</i><br>(kcal) | <i>Protein</i><br>(gram/<br>E%) | <i>Fat</i><br>(gram<br>/ E%) | <i>Carb</i><br>(gram<br>/ E%) | <i>Fiber</i><br>(gram<br>/ E%) | <i>Energy</i><br>(kcal) | <i>Protein</i><br>(gram /<br>E%) | <i>Fat</i><br>(gram<br>/ E%) | <i>Carb</i><br>(gram<br>/ E%) | <i>Fiber</i><br>(gram<br>/ E%) |
| 1        | 488                     | 22/18                           | 33/59                        | 25/20                         | 6/2                            | 331                     | 17/21                            | 17/46                        | 24/30                         | 7/4                            |
| 2        | 184                     | 7/15                            | 3/15                         | 29/64                         | 6/7                            | 258                     | 13/20                            | 10/33                        | 27/42                         | 7/5                            |
| 3        | 301                     | 12/16                           | 22/63                        | 14/19                         | 3/2                            | 267                     | 16/24                            | 15/50                        | 15/23                         | 4/3                            |
| 4        | 191                     | 10/20                           | 12/55                        | 11/24                         | 0,7/0,7                        | 420                     | 28/28                            | 16/34                        | 37/36                         | 5/2                            |
| 5        | 209                     | 8/16                            | 5/21                         | 31/60                         | 5/5                            | 248                     | 10/17                            | 8/28                         | 30/49                         | 8/6                            |
| 6        | 241                     | 8/14                            | 5/17                         | 38/64                         | 8/6                            | 81                      | 3/15                             | 2/26                         | 10/52                         | 3/8                            |
| 7        | 515                     | 20/16                           | 21/36                        | 55/43                         | 12/5                           | 362                     | 24/27                            | 13/33                        | 33/37                         | 5/3                            |
| 8        | 230                     | 10/18                           | 11/40                        | 22/39                         | 3/2                            | 537                     | 33/25                            | 19/32                        | 53/40                         | 8/3                            |
| 9        | 526                     | 26/20                           | 24/40                        | 49/38                         | 5/2                            | 309                     | 23/30                            | 10/29                        | 31/41                         | 5/3                            |
| 10       | 260                     | 9/14                            | 12/41                        | 28/43                         | 3/2                            | 248                     | 14/23                            | 9/30                         | 26/42                         | 5/5                            |
| 11       | 119                     | 7/24                            | 6/41                         | 9/30                          | 3/5                            | 131                     | 8/25                             | 7/44                         | 8/26                          | 3/5                            |
| 12       | 298                     | 10/13                           | 9/26                         | 43/58                         | 5/3                            |                         |                                  |                              |                               |                                |
| 13       | 328                     | 16/19                           | 3/9                          | 56/70                         | 5/3                            | 310                     | 13/17                            | 10/29                        | 39/51                         | 5/3                            |
| 14       | 443                     | 18/16                           | 20/41                        | 45/41                         | 5/2                            | 141                     | 8/22                             | 6/40                         | 12/35                         | 3/3                            |
| 15       | 332                     | 11/14                           | 8/22                         | 51/62                         | 4/2                            | 221                     | 16/30                            | 5/21                         | 25/46                         | 4/4                            |
| 16       | 213                     | 7/13                            | 3/13                         | 36/69                         | 5/5                            | 253                     | 15/24                            | 9/32                         | 24/39                         | 6/5                            |
| 17       | 291                     | 10/14                           | 14/43                        | 28/40                         | 8/5                            | 537                     | 15/12                            | 33/55                        | 40/31                         | 9/3                            |
| 18       | 497                     | 21/17                           | 27/48                        | 41/34                         | 4/1                            | 188                     | 11/24                            | 4/19                         | 14/30                         | 4/4                            |
| 19       | 300                     | 12/16                           | 13/38                        | 31/43                         | 10/6                           | 385                     | 18/19                            | 15/35                        | 42/44                         | 8/4                            |
| 20       | 343                     | 13/16                           | 16/40                        | 33/40                         | 8/4                            | 175                     | 9/21                             | 9/44                         | 14/32                         | 4/4                            |
| 21       | 383                     | 15/16                           | 11/26                        | 51/54                         | 8/4                            | 299                     | 10/13                            | 6/17                         | 49/67                         | 8/5                            |
| 22       | 590                     | 25/17                           | 29/44                        | 55/38                         | 4/1                            |                         |                                  |                              |                               |                                |
| 23       | 390                     | 17/17                           | 11/26                        | 51/53                         | 8,5/4                          | 364                     | 14/16                            | 15/37                        | 38/42                         | 9/5                            |
| 24       | 555                     | 19/14                           | 26/42                        | 56/41                         | 11/4                           | 488                     | 25/21                            | 15/27                        | 58/48                         | 9/3                            |
| 25       | 502                     | 25/20                           | 18/32                        | 57/46                         | 5/2                            | 341                     | 19/23                            | 17/43                        | 27/32                         | 5/3                            |
| 26       | 212                     | 10/19                           | 4/17                         | 31/59                         | 6/5                            | 265                     | 15/23                            | 3/11                         | 39/60                         | 9/6                            |
| 27       | 465                     | 20/18                           | 18/32                        | 53/46                         | 4/2                            | 355                     | 24/27                            | 14/35                        | 31/36                         | 5/3                            |
| 28       | 290                     | 15/21                           | 17/53                        | 18/25                         | 2/1                            |                         |                                  |                              |                               |                                |
| 29       | 153                     | 6/17                            | 3/19                         | 24/65                         | 4/4                            | 305                     | 15/20                            | 9/27                         | 38/51                         | 8/5                            |
| 30       | 454                     | 21/19                           | 16/31                        | 52/47                         | 7/3                            | 374                     | 20/21                            | 11/26                        | 45/50                         | 7/3                            |

(N = 30). Carb = carbohydrates, E% = energy percentage

**Supplementary Table S4.** Amount of fat and fiber in the diet to type 2 diabetes patients before, during and after the 12-week interventional study

| <b>Subjects</b> | <b>Fat</b>      |                |                | <b>Fiber</b>    |                |                |
|-----------------|-----------------|----------------|----------------|-----------------|----------------|----------------|
|                 | <i>Baseline</i> | <i>Week 12</i> | <i>Week 28</i> | <i>Baseline</i> | <i>Week 12</i> | <i>Week 28</i> |
| 1               | 38              | 5              | 10             | 11              | 14             | 12             |
| 2               | 42              | 15             | 35             | 17              | 16             | 15             |
| 3               | 31              | 22             | 23             | 11              | 14             | 11             |
| 4               | 61              | 51             | 34             | 8               | 17             | 16             |
| 5               | 43              | 13             | 12             | 12              | 16             | 15             |
| 6               | 43              | 20             | 31             | 14              | 15             | 14             |
| 7               | 50              | 14             | 21             | 13              | 13             | 12             |
| 8               | 56              | 22             | 34             | 10              | 15             | 13             |
| 9               | 87              | 29             | 20             | 13              | 13             | 8              |
| 10              | 75              | 22             |                | 9               | 12             |                |
| 11              | 33              | 34             | 21             | 10              | 11             | 12             |
| 12              | 51              |                |                | 9               |                |                |
| 13              | 19              | 4              |                | 13              | 13             |                |
| 14              | 73              | 48             | 36             | 8               | 11             | 10             |
| 15              | 28              | 12             | 23             | 9               | 14             | 10             |
| 16              | 28              | 31             | 11             | 11              | 15             | 13             |
| 17              | 45              | 38             | 55             | 12              | 13             | 13             |
| 18              | 50              | 23             | 16             | 14              | 16             | 16             |
| 19              | 33              | 26             | 36             | 15              | 16             | 16             |
| 20              | 68              | 14             | 39             | 13              | 16             | 14             |
| 21              | 60              | 42             |                | 13              | 12             |                |
| 22              | 47              |                |                | 10              |                |                |
| 23              | 39              | 11             | 28             | 13              | 12             | 13             |
| 24              | 40              | 2              | 25             | 10              | 16             | 14             |
| 25              | 40              | 7              | 33             | 22              | 15             | 16             |
| 26              | 23              | 3              | 3              | 13              | 16             | 16             |
| 27              | 41              | 33             | 33             | 14              | 16             | 16             |
| 28              | 60              | 22             |                | 13              | 14             |                |
| 29              | 27              | 5              |                | 12              | 14             |                |
| 30              | 23              | 21             | 22             | 14              | 16             | 14             |

The scores are calculated from the nutrition questionnaire, where the scores for fat means: <40 is rather small amounts of fat, 40-50 is good, 51-71 is too much fat and > 71 is quite too much. The scores for fiber means: 17-20 is very good, 12-16 is rather good, may be improved, and 6-11 is too low [18].

**Supplementary Table S5.** Anthropometric and metabolic characteristics of the type 2 diabetes cohort

| Variable                 | Mean $\pm$ SD     | P-value |
|--------------------------|-------------------|---------|
| Weight (kg)              |                   |         |
| Baseline                 | 89.8 $\pm$ 15.0   |         |
| Week 12                  | 83.5 $\pm$ 14.3   | <0.001  |
| Week 28                  | 83.6 $\pm$ 15.2   | <0.001  |
| BMI (kg/m <sup>2</sup> ) |                   |         |
| Baseline                 | 29.9 $\pm$ 4.1    |         |
| Week 12                  | 27.9 $\pm$ 4.1    | <0.001  |
| Week 28                  | 28.4 $\pm$ 4.6    | <0.001  |
| Waist circumference      |                   |         |
| Baseline                 | 107.3 $\pm$ 11.0  |         |
| Week 12                  | 101.0 $\pm$ 11.5  | <0.001  |
| Week 28                  | 99.3 $\pm$ 11.2   | <0.001  |
| Systolic blood pressure  |                   |         |
| Baseline                 | 140.2 $\pm$ 16.3  |         |
| Week 12                  | 1130.4 $\pm$ 14.5 | <0.001  |
| Week 28                  | 137.8 $\pm$ 12.7  | 0.643   |
| Diastolic blood pressure |                   |         |
| Baseline                 | 82.3 $\pm$ 11.9   |         |
| Week 12                  | 74.8 $\pm$ 10.3   | 0.001   |
| Week 28                  | 77.6 $\pm$ 8.8    | 0.060   |
| Fasting glucose (mmol/L) |                   |         |
| Baseline                 | 9.7 $\pm$ 3.5     |         |
| Week 12                  | 7.9 $\pm$ 2.7     | <0.001  |
| Week 28                  | 9.0 $\pm$ 3.3     | 0.556   |
| HbA1c (mmol/mol)         |                   |         |
| Baseline                 | 62.9 $\pm$ 18.7   |         |
| Week 12                  | 49.1 $\pm$ 10.3   | <0.001  |
| Week 28                  | 53.1 $\pm$ 13.3   | 0.010   |
| Insulin (mIU/L)          |                   |         |
| Baseline                 | 15.5 $\pm$ 9.7    |         |
| Week 12                  | 11.7 $\pm$ 6.7    | <0.001  |
| Week 28                  | 12.8 $\pm$ 7.4    | 0.064   |
| Triglycerides (mmol/L)   |                   |         |
| Baseline                 | 1.8 $\pm$ 1.1     |         |
| Week 12                  | 1.5 $\pm$ 0.9     | 0.018   |
| Week 28                  | 1.9 $\pm$ 1.6     | 0.250   |
| Cholesterol (mmol/L)     |                   |         |
| Baseline                 | 4.6 $\pm$ 0.8     |         |
| Week 12                  | 4.2 $\pm$ 1.0     | 0.003   |
| Week 28                  | 4.6 $\pm$ 0.8     | 0.875   |
| Interleukon-18           |                   |         |
| Baseline                 | 226 $\pm$ 26      |         |
| Week 12                  | 189 $\pm$ 26      | 0.002   |
| Week 28                  | 201 $\pm$ 27      | 0.212   |
| Fat intake (score)       |                   |         |
| Baseline                 | 45.1 $\pm$ 16.7   |         |
| Week 12                  | 21.0 $\pm$ 13.5   | <0.001  |
| Week 28                  | 26.1 $\pm$ 11.6   | <0.001  |
| Fiber intake (score)     |                   |         |
| Baseline                 | 12.2 $\pm$ 2.8    |         |
| Week 12                  | 14.3 $\pm$ 1.7    | 0.001   |
| Week 28                  | 13.0 $\pm$ 3.4    | 0.416   |

N = 30 subjects. The mean values and standard deviations (SD) are presented for body mass index (BMI), fasting blood values of hemoglobin A1c (HbA1c); fasting serum levels of insulin; and fasting plasma values of glucose, triglycerides, and cholesterol. Analyses are performed by standard methods at the Department of Clinical Chemistry.

Values are shown at inclusion (baseline), 12 weeks after diet intervention and 16 weeks after the end of diet intervention (week 28, N = 23). Comparisons were made between each time point and baseline, using Student's paired test. P-value < 0.05 was considered statistically significant.

**Supplementary Table S6.** Visual Analog Scale for Irritable Bowel Syndrome for evaluation of gastrointestinal symptoms

| <b>Variable</b>                        | <b>Median (interquartile range)<br/>N = 30</b> | <b>P-value</b> |
|----------------------------------------|------------------------------------------------|----------------|
| <b><i>Pain</i></b>                     |                                                |                |
| Baseline                               | 6 (2-22)                                       |                |
| Week 12                                | 3 (2-15)                                       | 0.033          |
| Week 28                                | 3 (2-7)                                        | 0.192          |
| <b><i>Diarrhea</i></b>                 |                                                |                |
| Baseline                               | 8 (3-35)                                       |                |
| Week 12                                | 3 (2-16)                                       | 0.023          |
| Week 28                                | 2 (1-6)                                        | 0.020          |
| <b><i>Constipation</i></b>             |                                                |                |
| Baseline                               | 4 (1-21)                                       |                |
| Week 12                                | 3 (2-24)                                       | 0.806          |
| Week 28                                | 4 (2-20)                                       | 0.703          |
| <b><i>Bloating</i></b>                 |                                                |                |
| Baseline                               | 22 (5-55)                                      |                |
| Week 12                                | 8 (2-35)                                       | 0.085          |
| Week 28                                | 6 (2-20)                                       | 0.015          |
| <b><i>Nausea</i></b>                   |                                                |                |
| Baseline                               | 3 (1-8)                                        |                |
| Week 12                                | 2 (1-4)                                        | 0.466          |
| Week 28                                | 2 (2-4)                                        | 0.112          |
| <b><i>Psychological well-being</i></b> |                                                |                |
| Baseline                               | 19 (4-38)                                      |                |
| Week 12                                | 5 (2-16)                                       | 0.002          |
| Week 28                                | 4 (2-15)                                       | 0.049          |
| <b><i>Influence on daily life</i></b>  |                                                |                |
| Baseline                               | 6 (1-35)                                       |                |
| Week 12                                | 4 (2-28)                                       | 0.522          |
| Week 28                                | 3 (1-9)                                        | 0.558          |

Symptoms assessed on a VAS scale 0-100 where 0 means absence of symptoms and 100 means maximal symptoms [19]. The median and interquartile mean values at inclusion (baseline), 12 weeks after diet intervention, and 16 weeks after the end of diet intervention (week 28). Increase of values indicate improved symptoms. Comparisons were made between each time point and baseline, using Wilcoxon's test. P-value <0.05 is considered statistically significant.

## 19 questions about your food habits

Mark the letter after the question which best matches your eating habits.

|                                                                           | Fat | Fiber |  |
|---------------------------------------------------------------------------|-----|-------|--|
| <b>1. On my sandwiches, I usually spread</b>                              |     |       |  |
| A butter, Bregott or margarine (80 %).....2                               | }   |       |  |
| B light margarine (e.g. Lätkä, Becel, medium Bregott) .....1              |     |       |  |
| C no fat.....0                                                            |     |       |  |
| <b>2. As topping I most often have</b>                                    |     |       |  |
| A cheese (28%), sausage, paté.....3                                       | }   |       |  |
| B cheese (17%), lean ham, hamburger meat, mackerel .....1                 |     |       |  |
| C marmelade, honey.....0                                                  |     |       |  |
| D no topping.....0                                                        |     |       |  |
| E A as often as B.....2                                                   |     |       |  |
| <b>3. I eat bread (even hard bread) every day</b>                         |     |       |  |
| A maximal 2 slices.....1                                                  | }   |       |  |
| B 2-5 slices.....2                                                        |     |       |  |
| C 6-9 slices.....4                                                        |     |       |  |
| D minimal 10 slices.....5                                                 |     |       |  |
| <b>4. I mostly eat</b>                                                    |     |       |  |
| A white bread.....1                                                       | }   |       |  |
| B loaf, bread.....1                                                       |     |       |  |
| C coarse rye bread, crisp bread, wholemeal bread (no visible grains)....2 |     |       |  |
| D whole grains (partly with whole grains).....3                           |     |       |  |
| <b>5. Of milk, fil and youghurt I drink/eat</b>                           |     |       |  |
| A At least 1 liter daily.....6                                            | }   |       |  |
| B 3-10 dl daily.....4                                                     |     |       |  |
| C At most .2dl daily.....1                                                |     |       |  |
| D Almost nothing.....0                                                    |     |       |  |

**6. Of milk, fil and yoghurt I drink/eat**

A most standard milk products (3% fat).....6

B most medium milk products (1.5% fat).....3

C most skimmed milk products (0.5% fat).....1

|   |   |   |                      |   |                      |   |                      |       |                      |                      |
|---|---|---|----------------------|---|----------------------|---|----------------------|-------|----------------------|----------------------|
| } |   | → | <input type="text"/> | x | <input type="text"/> | = | <input type="text"/> | <hr/> | <input type="text"/> | <input type="text"/> |
| 6 | 3 |   |                      |   |                      |   |                      |       |                      |                      |

Sum to next page:

|                                                                                            |                                          | Fat                  | Fiber                |
|--------------------------------------------------------------------------------------------|------------------------------------------|----------------------|----------------------|
| Sum from previous page:                                                                    |                                          | <input type="text"/> | <input type="text"/> |
| <b>7. I eat porridge, muesli or breakfast cereals</b>                                      |                                          |                      |                      |
| A                                                                                          | seldom or never.....1                    | }                    | <input type="text"/> |
| B                                                                                          | some times weekly.....2                  |                      |                      |
| C                                                                                          | almost daily.....3                       |                      |                      |
|                                                                                            |                                          |                      |                      |
| <b>8. For lunch or dinner I eat all meat, mince or sausage (except venison or chicken)</b> |                                          |                      |                      |
| A                                                                                          | almost daily.....20                      | }                    | <input type="text"/> |
| B                                                                                          | some times weekly.....10                 |                      |                      |
| C                                                                                          | once weekly.....3                        |                      |                      |
| D                                                                                          | more seldom or never.....1               |                      |                      |
|                                                                                            |                                          |                      |                      |
| <b>9. Fruit or berries I eat</b>                                                           |                                          |                      |                      |
| A                                                                                          | seldom.....1                             | }                    | <input type="text"/> |
| B                                                                                          | some times weekly.....2                  |                      |                      |
| C                                                                                          | daily.....3                              |                      |                      |
|                                                                                            |                                          |                      |                      |
| <b>10. Whipped cream or crème fraiche, fat (also in sauces and the like) I eat</b>         |                                          |                      |                      |
| A                                                                                          | a few times weekly or more seldom.....10 | }                    | <input type="text"/> |
| B                                                                                          | about once weekly.....3                  |                      |                      |
| C                                                                                          | more seldom or never.....1               |                      |                      |
|                                                                                            |                                          |                      |                      |
| <b>11. I eat chips or other types of snacks</b>                                            |                                          |                      |                      |
| A                                                                                          | almost daily.....20                      | }                    | <input type="text"/> |
| B                                                                                          | some times weekly.....10                 |                      |                      |
| C                                                                                          | once daily.....3                         |                      |                      |
| D                                                                                          | more seldom or never.....1               |                      |                      |

**12. I eat chocolate pieces and sweets**

- A almost daily.....30  
B some times weekly .....15  
C once daily .....4  
D more seldom or never .....1
- } → ☐

**13. I eat coffee bread or ice cream**

- A almost daily .....12  
B some times weekly .....6  
C once daily .....2  
D more seldom or never .....1
- } → ☐

**14. Vegetables**

(except tomatoes, cucumber or lettuce) I eat

- A a few times weekly or more seldom .....1  
B once weekly .....2  
C more than once daily.....3
- } → ☐

**15. I eat French fries or fried potatoes**

- A some times weekly.....22  
B once weekly.....6  
C a few times monthly.....3  
D more seldom or never .....1
- } → ☐

**16. I eat root vegetables and other types of vegetables**

- A. some times weekly, or more seldom.....1  
B. once daily.....2  
C. more than once daily.....3
- } → ☐

Sum to next page:

☐ ☐

|                                                                                                                                             |  | Fett                 | Fiber                |
|---------------------------------------------------------------------------------------------------------------------------------------------|--|----------------------|----------------------|
| Sum from previous page :                                                                                                                    |  | <input type="text"/> | <input type="text"/> |
|                                                                                                                                             |  | minus                |                      |
| <b>17. I eat fish</b><br>A as most once monthly.....0<br>B a few times monthly.....2<br>C once weekly.....4<br>D at least twice daily.....6 |  | <input type="text"/> |                      |
| Total sum point:                                                                                                                            |  | <input type="text"/> | <input type="text"/> |

**18. I eat breakfast**

- A daily
- B a few times weekly
- C more seldom or never

**19. I eat three (3) main meals per day**

- A daily
- B some times weekly
- C once weekly
- D a few times monthly
- E more seldom or never

**What does your usual, daily breakfast consist of:**

---



---



---

**Fiber point:**

17-20 very good  
 12-16 rather good  
 6-11 too low

**Fat point: Calculated in 2000 kcal.**

<40 rather small amounts of fat  
 40-50 good.  
 51-71 too much fat  
 >71 quite too much

## **Study protocol Diabetes, Metabolomics, and Microbiota**

1. Identifying cases with type 2 diabetes from a healthcare center
2. The patients are contacted by a letter, with a question whether they want to participate in the study and information about a phone call within some days.(BO, EL)
3. Patients are called to ask whether they want to be included in the study.  
When the patients are called, they are screened for inclusion criteria and exclusion criteria

### *Inclusion criteria:*

Age span: 18–70 years  
Both parents born in Scandinavia  
Type 2 diabetes

### *Exclusion criteria:*

Alcohol and/or drug abuse  
Already on ongoing weight-reducing diet  
Inability to understand the Swedish language  
Major prior gastrointestinal surgery  
Pregnancy  
Severe food allergy  
Severe heart, pulmonary, cardiovascular, malignant or psychiatric diseases  
Severe liver disease (spontaneous prothrombin complex (INR) > 1.1)  
Severe renal disease (glomerular filtration rate (GFR) < 30 mL/min/1.73 m<sup>2</sup>)  
Type 1 diabetes

4. If the patient is interested in the study and fulfill the inclusion criteria and no exclusion criteria, a letter is sent home to the patient with further information about the study, a letter to sign for approval to participate in the study, a study questionnaire about lifestyle habits, sociodemographic parameters, and medical history; nutrition questionnaire; SF-36 short-form questionnaire; and visual analog scale for irritable bowel syndrome (VAS-IBS) to be completed before the first visit. Instructions were also included on how to sample feces and tubes for feces samples.
5. Visit 1 at the hospital.
  - a. The study questionnaires are delivered from the patients (study questionnaire about basal characteristics, nutrition questionnaire; SF-36; satiety scoring; VAS-IBS).
  - b. After this, the patient meet a doctor (Bodil Ohlsson or Ghassan Darwiche) who controls that all questionnaires are completed correctly. Anamnesis is taken and a basal physical status is performed. Physician protocol is completed. Dietary instructions are given in oral and written form. The patients are given all questionnaires to complete at home after the 12-week intervention (study questionnaire; Nutrition questionnaire, VAS-IBS; SF-36).
  - c. Blood, feces and urine sampling
6. Visit 2 at the hospital
  - a. Fasting plasma glucose, insulin, proinsulin, anthropometric protocol
7. Visit 3 at hospital
  - a. Fasting plasma glucose, insulin, proinsulin, anthropometric protocol
8. Visit 4 at hospital

- a. A meeting with the physician. Collection of all questionnaires and check that all are completed appropriately (study questionnaire; Nutrition questionnaire, VAS-IBS; SF-36)
  - b. Blood, feces and urine sampling
  - c. The dietary intervention is finished.
- 9. Visit 5 at hospital
  - a. Follow-up after further 4 months weeks with the same protocols and sampling as visit 4.

## **Analyses**

**Feces:** gut microbiota with 16S RNA. Commercially available in Kiel

**Blood** samples: plasma metabolomics: Metabolomics in Umeå

Hormone and cytokine analyses in Malmö through ELISA and mesoscale. Standard analyses at Department of Clinical Chemistry, Skåne University Hospital, Malmö.

**Overall study questions:** To evaluate the clinical effects of a modified diet on metabolic risk factors such as diabetes and obesity, and the mechanisms this nutrition composition exerts on gastrointestinal physiology, inflammatory responses, and quality of life, where the controls are their own controls.

Within this study, we will be able to relate the nutritional composition to metabolic disorders, the gut microbiota, secreted intestinal neuropeptides, and bio- and inflammatory markers in serum, plasma, and urine

## **Statistical analysis plan**

Traditional statistical analyses (parametric or non-parametric tests, Fisher's exact test) were intended to use to study basal characteristics, change in symptoms, and laboratory analyses. Bioinformatical analyses for microbiota. Biostatistical analysis for metabolomics.
